# Supplementary material
Source: PubMed Central journal article supplement (PMC2956167)
Supplement: NIHMS231529-supplement-3.pdf [file NIHMS231529-supplement-3.pdf]

# A498 Tumor

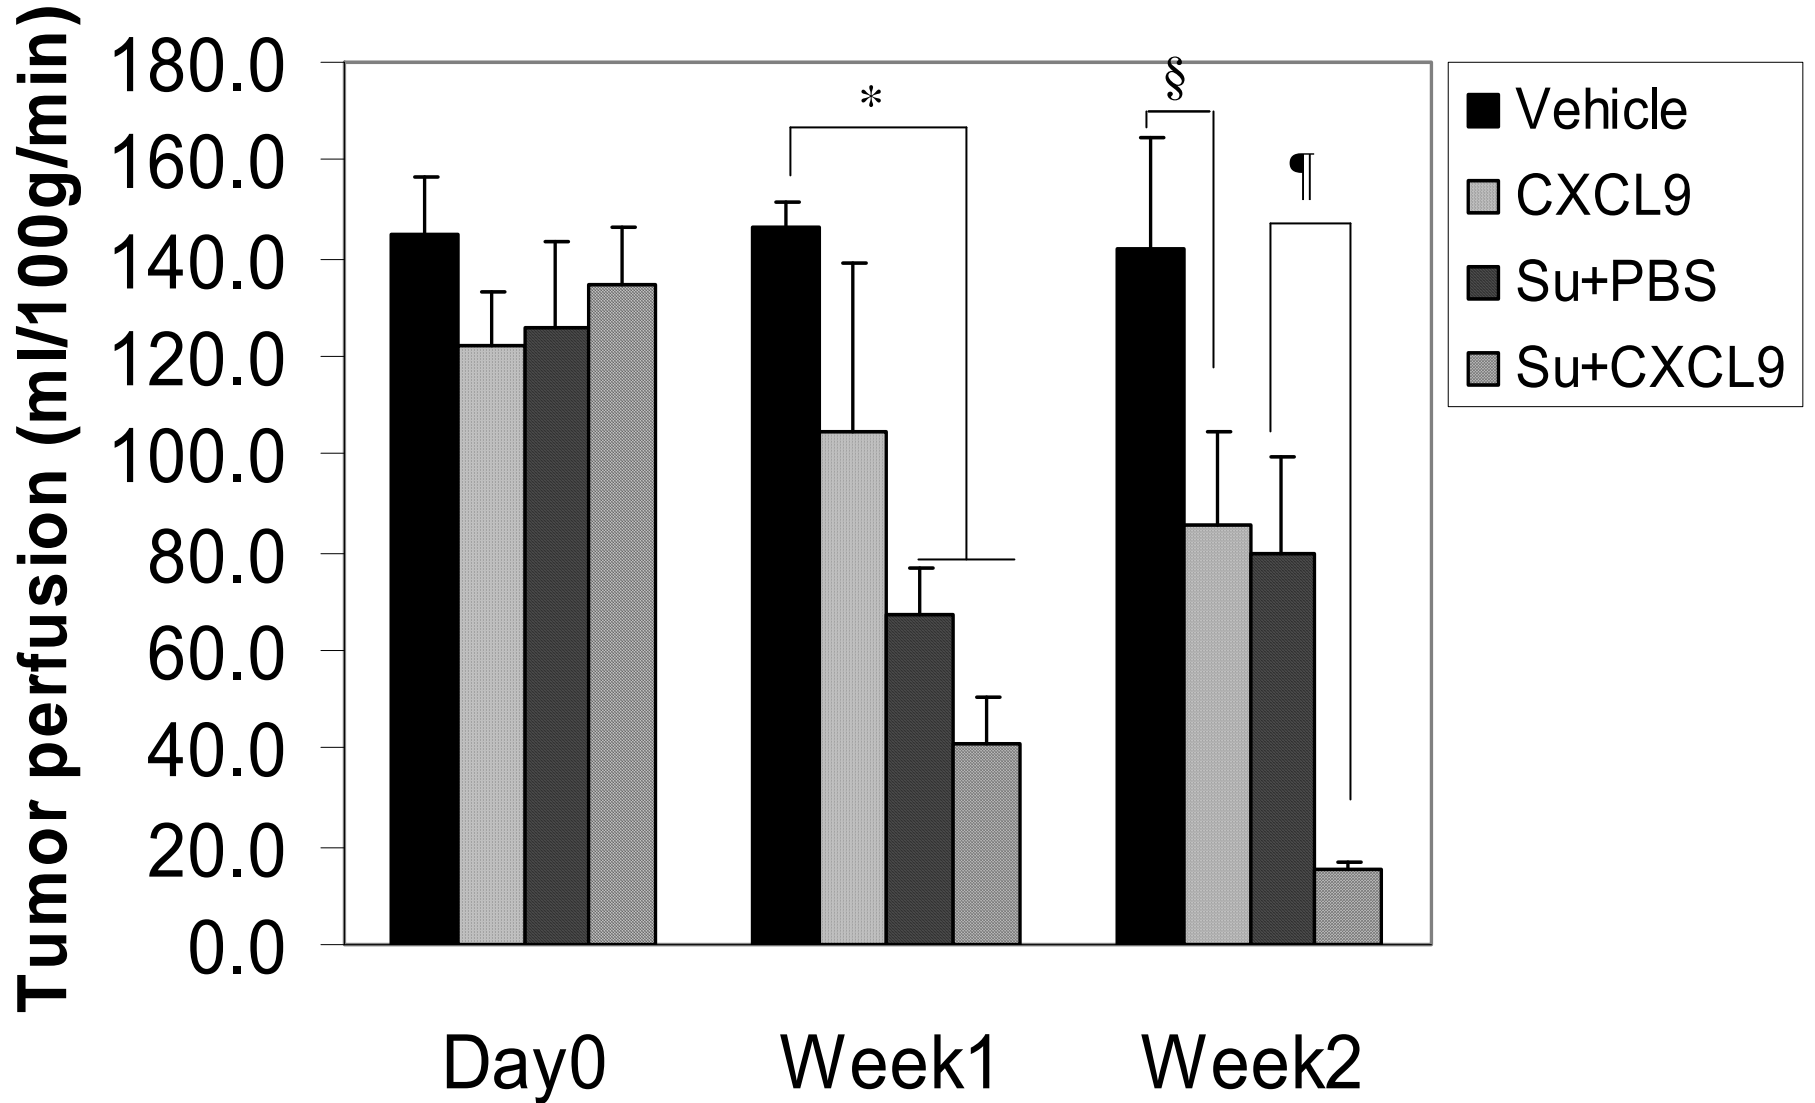

**Supplemental Figure.** Tumor perfusion of A498 tumors is shown. As seen in the 786-O model, while there is little change over time in vehicle treated tumors, sunitinib treatment lowers tumor perfusion compared to vehicle treated tumors (\* $P \leq 0.001$ ). CXCL9 alone lowers perfusion (§  $P = 0.001$ ) and CXCL9 when added to sunitinib, lowers perfusion to a greater extent than sunitinib itself (¶  $P = 0.001$ ).
